# Supplementary material for: Freestanding single layers of non-layered material γ-Ga2O3 as an efficient photocatalyst for overall water splitting
Source: Royal Society of Chemistry journal article supplement (doi:10.1039/c7ta02043k), 2017-01-01
Supplement: c7ta02043k1.pdf [file c7ta02043k1.pdf]

## Supporting Information

For

# Freestanding single layers of non-layered material $\gamma$ -Ga<sub>2</sub>O<sub>3</sub> as an efficient photocatalyst for overall water splitting

Xiaoyan Zhang, Zizhong Zhang\*, Jun Liang, Yangen Zhou, Yuecong Tong, Ying Wang and Xuxu Wang\*

*<sup>a</sup> State Key Lab of Photocatalysis on Energy and Environment, College of Chemistry, Fuzhou University, Fuzhou, 350116, P. R. China.*

### \*Corresponding authors:

Zizhong Zhang: State Key Lab of Photocatalysis on Energy and Environment, School of Chemistry, Fuzhou University, Fuzhou, 350116, P. R. China,

Tel: +86-591-83779251, E-Mail: [z.zhang@fzu.edu.cn](mailto:z.zhang@fzu.edu.cn)

Xuxu Wang: State Key Lab of Photocatalysis on Energy and Environment, School of Chemistry, Fuzhou University, Fuzhou, 350116, P. R. China,

Tel: +86-591-83779251, E-Mail: [xwang@fzu.edu.cn](mailto:xwang@fzu.edu.cn)

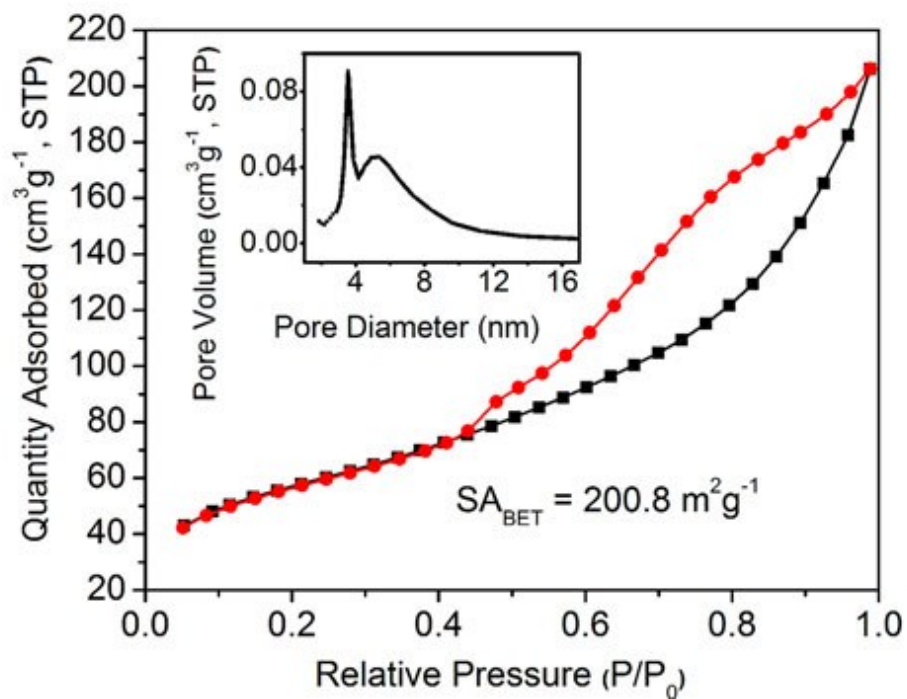

**Fig. S1** N<sub>2</sub> adsorption–desorption isotherms of  $\gamma$ -Ga<sub>2</sub>O<sub>3</sub> nanosheets.

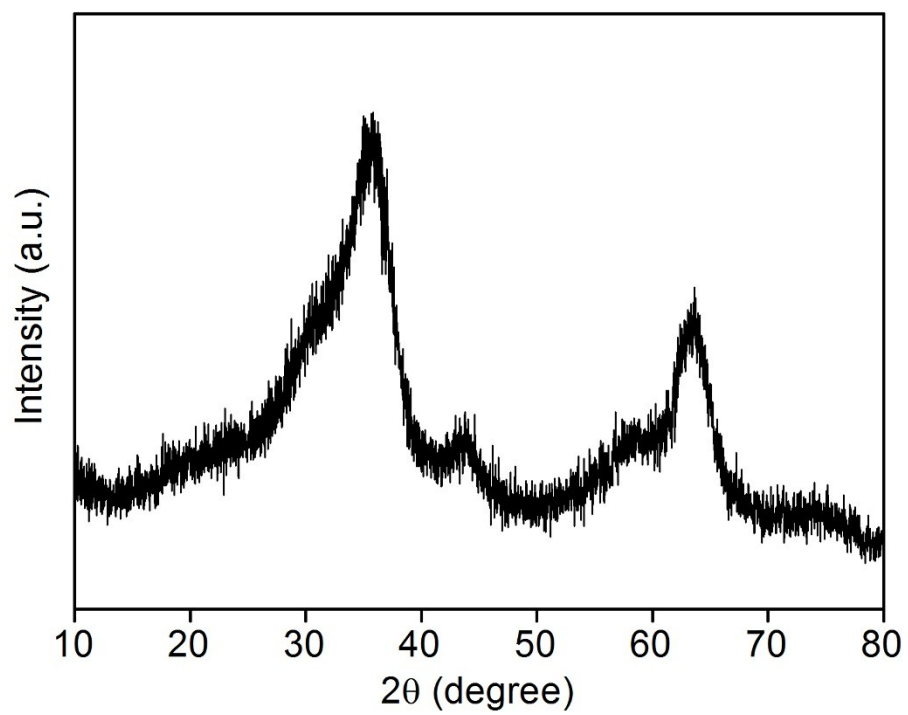

**Fig. S2** XRD pattern of bulk  $\gamma$ -Ga<sub>2</sub>O<sub>3</sub> prepared according to the literature.

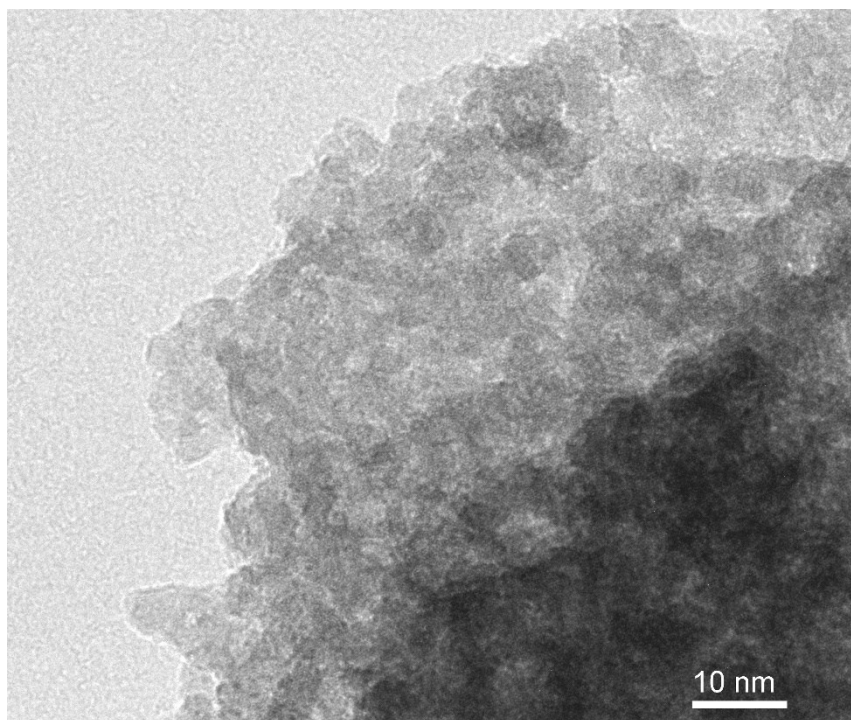

**Fig. S3** TEM image of bulk  $\gamma$ -Ga<sub>2</sub>O<sub>3</sub>.

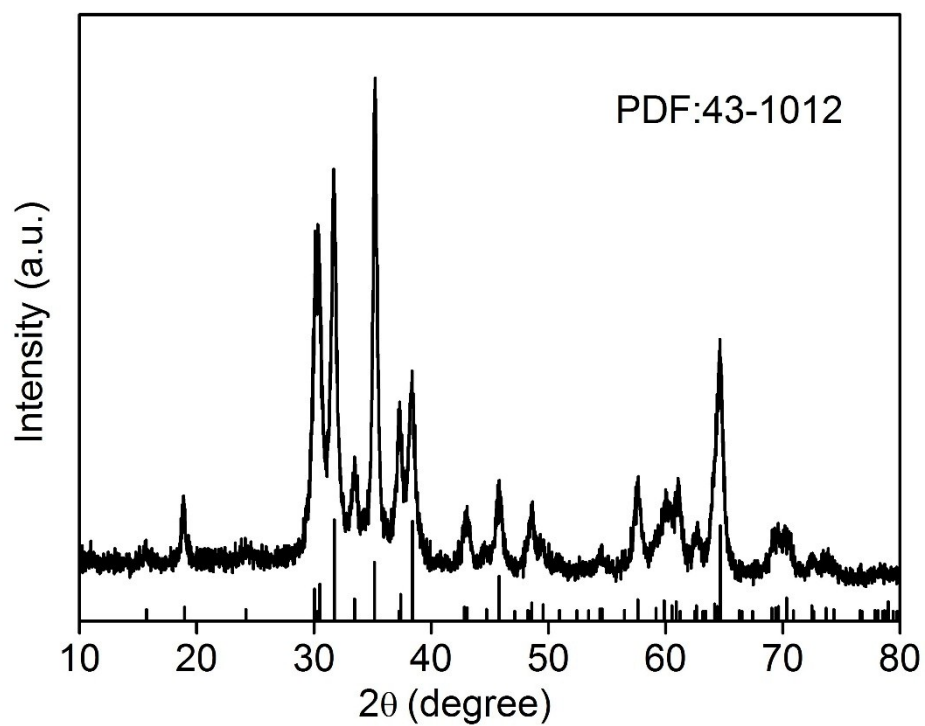

**Fig. S4** XRD pattern of  $\beta$ -Ga<sub>2</sub>O<sub>3</sub> synthesized using  $\gamma$ -Ga<sub>2</sub>O<sub>3</sub> nanosheets sintering at 973 K for 3 h.

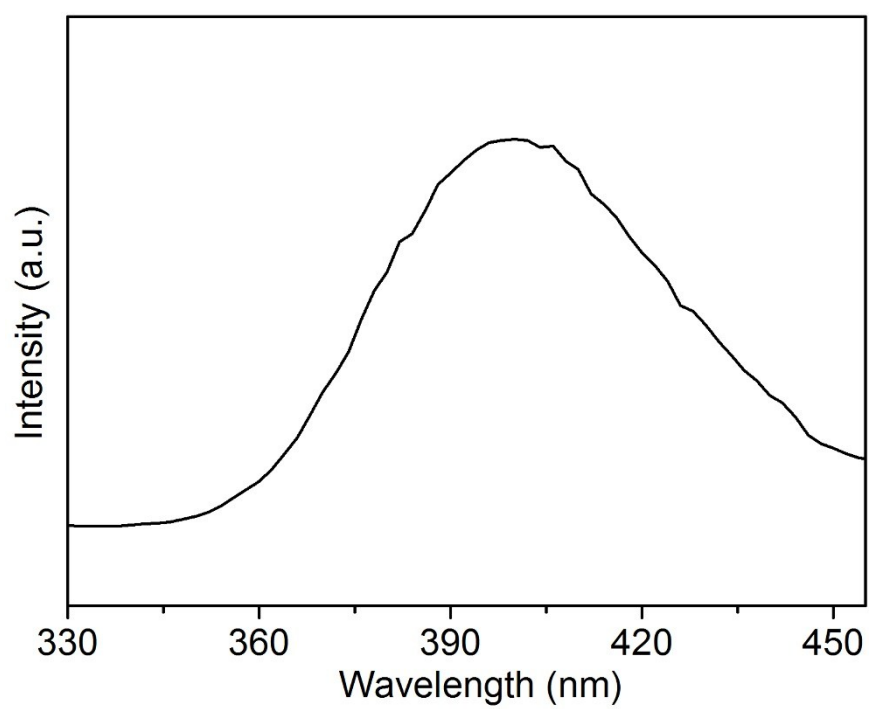

**Fig. S5** Room temperature PL spectrum of the  $\gamma$ -Ga<sub>2</sub>O<sub>3</sub> monolayers upon excitation at 250 nm.

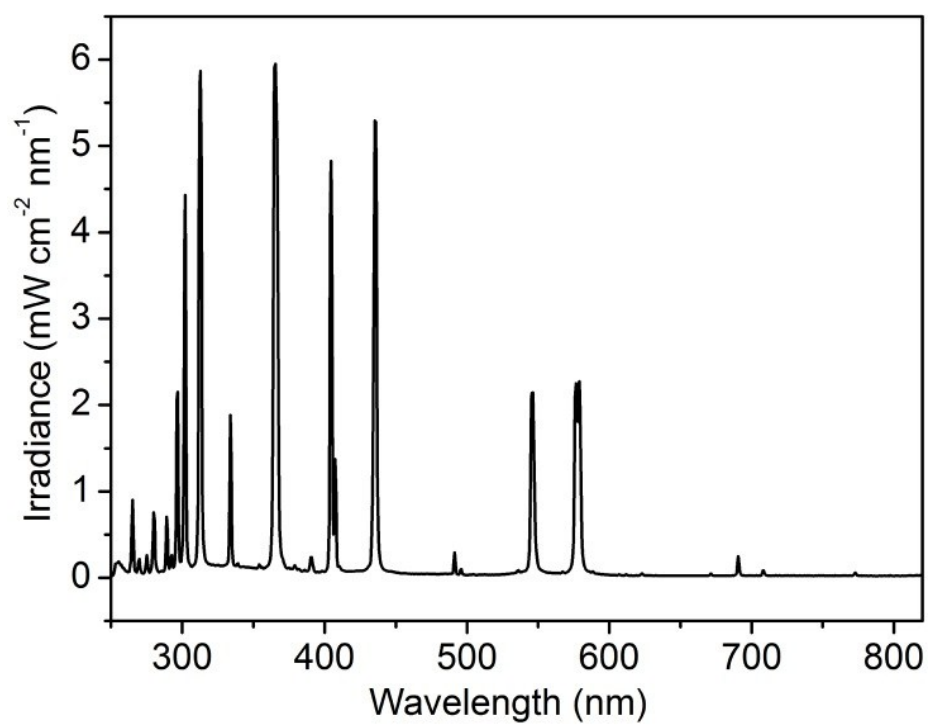

**Fig. S6** The irradiance spectrum of the high-voltage mercury lamp with 125W.
